# Supplementary material
Source: HighWire-hosted journal article supplement (https://bmjopen.bmj.com/content/15/3/e096224)
Supplement: inline-supplementary-material-2 [file inline-supplementary-material-2.pdf]

Supplemental file 2 - Data extraction instrument.

|                                                                                                                                                         |                                                            |
|---------------------------------------------------------------------------------------------------------------------------------------------------------|------------------------------------------------------------|
| Source details                                                                                                                                          | Author/year                                                |
|                                                                                                                                                         | Country                                                    |
|                                                                                                                                                         | Aims/purpose                                               |
|                                                                                                                                                         | Design                                                     |
|                                                                                                                                                         | Data collection methods                                    |
|                                                                                                                                                         | Care setting                                               |
|                                                                                                                                                         | Population/sample                                          |
|                                                                                                                                                         | Method                                                     |
|                                                                                                                                                         | Theoretical frameworks                                     |
| Research question 1:<br><br>Which PI preventive measures or bundles are used in the home environment?                                                   | Interventions                                              |
|                                                                                                                                                         | Duration of interventions                                  |
|                                                                                                                                                         | Primary outcome                                            |
|                                                                                                                                                         | Secondary outcomes                                         |
|                                                                                                                                                         | Measurements                                               |
|                                                                                                                                                         | Assessment interval                                        |
|                                                                                                                                                         | Results                                                    |
|                                                                                                                                                         | Limitations                                                |
| Research question 2:<br><br>Who are care bundles intended for in the home and community environments (e.g., lay caregivers, healthcare professionals)?  | Conclusion/recommendations                                 |
|                                                                                                                                                         | Professional (type)                                        |
|                                                                                                                                                         | Patient                                                    |
| Research question 3:<br><br>What are the facilitators and barriers when applying preventive measures or bundles in the home and community environments? | Lay caregiver (paid/non-paid; relationship to the patient) |
|                                                                                                                                                         | Guidance is given to the patient or caregiver              |
|                                                                                                                                                         | User-friendliness of the preventive measures               |
|                                                                                                                                                         | Challenges in implementing the preventive measures         |
